# Supplementary material
Source: publisher site journal article supplement (https://www.dovepress.com/article/538129)
Supplement: Supplementary file 1 [file Supplementary%20Figure%201_1.docx]

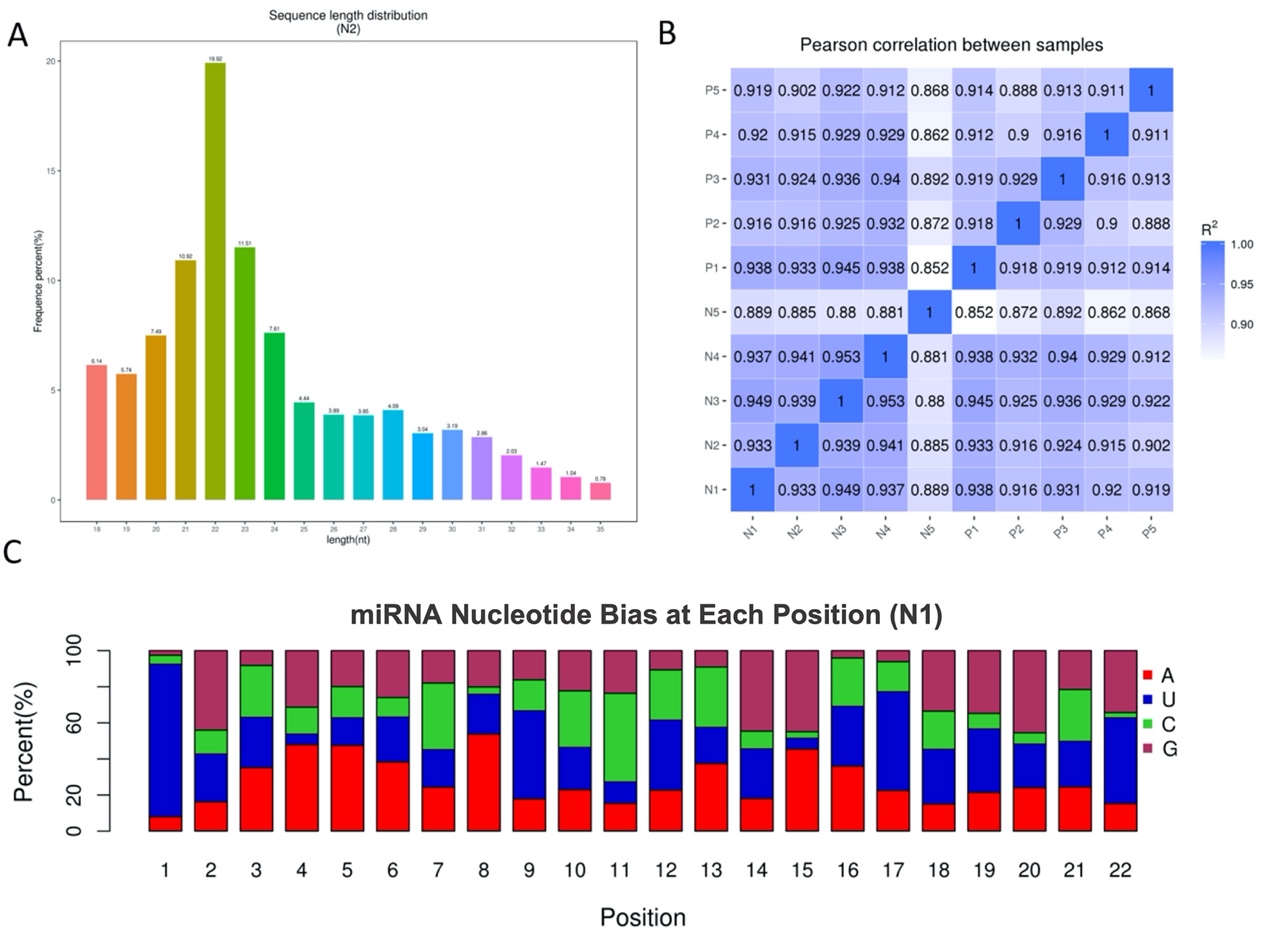


**Supplementary Figure 1. Quality control of data analysis.** (A) The percentages of reads with different lengths. (B) Pearson correlation analysis. (C) The percentages of the nucleotides in each position of the reads.
